# Supplementary material
Source: publisher site journal article supplement (https://mbmg.pensoft.net/article/69657/download/suppl/32/)
Supplement: Supplementary file 1

## Sheet: orientation
Supplementary Table 2: Number of sequences in each darn experiment for the evaluation step before and after the orientation step
Sample name	Sample status	# of ASVs built	# of sequences after orientation (complete db)	# of sequences after orientation (short db)
ERS6449795- ERS6449829	dada2	13376	13054	12570
	pema	39454	36478	35942
ERS6463899 - ERS6463901 ERS6463906 - ERS6463911 ERS6463913 - ERS6463918 ERS6463920 - ERS6463922	JAMP dada2 PEAR vsearch DnoisE	1304	1278	1272
	pema	11545	10459	11044
ERS6463744 - ERS6463761	dada2	663	624	621
	pema	5879	5056	5443
ERR3460466	pre_clustered	16106	15981	16073
	d = 2	193	193	193
	d = 10	109	106	109
ERR3460467	pre_clustered	7634	7593	7605
	d = 2	74	74	74
	d = 10	64	64	64
ERR3460470	pre_clustered	16118	16070	16080
	d = 2	186	184	183
	d = 10	107	107	106
ERS6488992	d = 10	416	191	329
ERS6488993	d = 10	335	260	294
ERS6488994	d = 10	823	387	632
ERS6488995	d = 10	1940	1706	1802
